# Supplementary material for: Rapid and Cost-Efficient Enterovirus Genotyping from Clinical Samples Using Flongle Flow Cells
Source: MDPI journal article supplement (doi:10.3390/genes10090659), 2019-08-29
Supplement: s1 [file s1]

| Sample Name | Referral Date | Patient material                 | C <sub>t</sub> value | Barcode Set 1 | Barcode Set 2 | Number of reads |                             |            |                             |            |                             |
|-------------|---------------|----------------------------------|----------------------|---------------|---------------|-----------------|-----------------------------|------------|-----------------------------|------------|-----------------------------|
|             |               |                                  |                      |               |               | RUN 1 Set 1     |                             | RUN 2 Set1 |                             | RUN 2 Set2 |                             |
|             |               |                                  |                      |               |               | Total           | Closest to the modal length | Total      | Closest to the modal length | Total      | Closest to the modal length |
| PC          | 05.09.2016    | Stool/cell culture               | 25.1                 | BC1           | BC18          | 3749            | 3000                        | 1682       | 1612                        | 2419       | 2307                        |
| NEV1        | 24.05.2016    | Stool                            | 25                   | BC2           | BC19          | 3967            | 3000                        | 1910       | 1561                        | 2939       | 2492                        |
| NEV2        | 15.06.2016    | Stool                            | 22.3                 | BC3           | BC20          | 2216            | 2118                        | 1315       | 1266                        | 2042       | 1971                        |
| NEV3        | 23.06.2016    | Stool                            | 21.6                 | BC4           | BC21          | 2520            | 2090                        | 1041       | 860                         | 1946       | 1709                        |
| NEV4        | 30.06.2016    | Stool                            | NA                   | BC5           | BC22          | 2854            | 2612                        | 1131       | 1019                        | 2195       | 2049                        |
| NEV6        | 05.07.2016    | Stool                            | NA                   | BC7           | BC24          | 3062            | 2948                        | 1290       | 1232                        | 1963       | 1842                        |
| NEV7        | 18.07.2016    | Stool                            | 27.8                 | BC8           | BC30          | 3418            | 3000                        | 1596       | 1526                        | 3172       | 3000                        |
| NEV8        | 19.07.2016    | Stool                            | 29.6                 | BC9           | BC31          | 2640            | 2431                        | 1232       | 1161                        | 2227       | 2112                        |
| NEV19       | 15.07.2018    | Stool                            | 30.2                 | BC12          | BC34          | 2069            | 2039                        | 994        | 968                         | 2475       | 2417                        |
| NEV35       | 28.07.2016    | Stool                            | 17                   | BC16          | BC43          | 3181            | 2505                        | 1363       | 1090                        | 2839       | 2395                        |
| NEV36       | 13.08.2016    | Stool                            | 24                   | BC17          | BC44          | 2379            | 2339                        | 1166       | 1142                        | 1858       | 1821                        |
| NEV38       | 26.08.2016    | Stool                            | 31.6                 | BC27          | BC45          | 3084            | 2995                        | 1631       | 1551                        | 2801       | 2653                        |
| NEV39       | 27.08.2016    | Stool                            | 22.2                 | BC28          | BC46          | 3667            | 3000                        | 1573       | 1409                        | 2498       | 2296                        |
| NEV40       | 29.08.2016    | Stool                            | 26.7                 | BC29          | BC47          | 3394            | 2968                        | 1471       | 1282                        | 2042       | 1802                        |
| NEV41       | 05.09.2016    | Stool                            | 25.1                 | BC37          | BC48          | 1918            | 1768                        | 1067       | 993                         | 1940       | 1789                        |
| NEV44       | 29.10.2018    | Nasopharyngeal swab/cell culture | NA                   | BC40          | BC54          | 3884            | 3000                        | 2102       | 2028                        | 3109       | 3000                        |
| GEV1        | 15.05.2017    | Stool                            | 20.3                 | BC61          | BC55          | 2056            | 1848                        | 940        | 853                         | 3055       | 2726                        |
| GEV2        | 09.06.2017    | Stool                            | 25.34                | BC73          | BC56          | 3968            | 3000                        | 1796       | 1652                        | 2592       | 2472                        |
| GEV3        | 09.06.2017    | Stool                            | 28.04                | BC74          | BC57          | 3712            | 3000                        | 1714       | 1557                        | 2447       | 2191                        |
| GEV4        | 12.06.2017    | Stool                            | 28                   | BC75          | BC58          | 2569            | 2410                        | 1359       | 1259                        | 2754       | 2503                        |
| GEV5        | 22.04.2017    | Stool                            | 25.7                 | BC76          | BC59          | 4059            | 3000                        | 1810       | 1730                        | 3234       | 3000                        |
| GEV7        | 10.07.2017    | Stool                            | 23                   | BC77          | BC60          | 3224            | 3000                        | 1646       | 1571                        | 1873       | 1718                        |
| GEV9        | 18.07.2017    | Stool                            | 27.8                 | BC85          | BC71          | 2211            | 1924                        | 1179       | 997                         | 2192       | 1821                        |
| GEV16       | 13.07.2017    | Stool                            | 22.13                | BC87          | BC68          | 1924            | 1659                        | 970        | 828                         | 3232       | 2738                        |
| GEV17       | 14.06.2017    | Stool                            | 21.3                 | BC88          | BC69          | 2921            | 2238                        | 1622       | 1193                        | 4753       | 3000                        |
| GEV22       | 06.06.2017    | Throat swab                      | 25.27                | BC89          | BC70          | 2547            | 2345                        | 1268       | 1113                        | 3488       | 3000                        |

**SI Table 1: Sample description and number of reads per barcode for each sequencing run.** Two samples were grown in cell culture before nucleic acid extraction. The indicated C<sub>t</sub> value from the RT-PCR analysis was always determined from the original material. The barcode numbers refer to the assignment according to PCR Barcoding Expansion 1-96 (EXP-PBC096) kit from Oxford Nanopore Technologies.
