# Supplementary material for: Rapid and Cost-Efficient Enterovirus Genotyping from Clinical Samples Using Flongle Flow Cells
Source: MDPI journal article supplement (doi:10.3390/genes10090659), 2019-08-29
Supplement: s1 [file s1]

| Sample Name | RUN1             |                                              |                                                | RUN2             |                                              |                                                |                  |                                              |                                                |
|-------------|------------------|----------------------------------------------|------------------------------------------------|------------------|----------------------------------------------|------------------------------------------------|------------------|----------------------------------------------|------------------------------------------------|
|             | Barcode Set 1    |                                              |                                                | Barcode Set 1    |                                              |                                                | Barcode Set 2    |                                              |                                                |
|             | Consensus length | Sequence match to closest reference sequence | Accession number of closest reference sequence | Consensus length | Sequence match to closest reference sequence | Accession number of closest reference sequence | Consensus length | Sequence match to closest reference sequence | Accession number of closest reference sequence |
| PC          | 324              | 309/324 (95.37%)                             | HG793732.1                                     | 323              | 308/324 (95.06%)                             | HG793732.1                                     | 323              | 308/324 (95.06%)                             | HG793732.1                                     |
| NEV1        | 300              | 299/300 (99.67%)                             | LT577809.1                                     | 300              | 299/300 (99.67%)                             | LT577809.1                                     | 300              | 299/300 (99.67%)                             | LT577809.1                                     |
| NEV2        | 300              | 300/300 (100.00%)                            | MH472702.1                                     | 300              | 299/300 (99.67%)                             | MH472702.1                                     | 300              | 299/300 (99.67%)                             | MH472702.1                                     |
| NEV3        | 324              | 313/324 (96.61%)                             | HG793726.1                                     | 323              | 312/323 (96.59%)                             | HG793726.1                                     | 324              | 313/324 (96.61%)                             | HG793726.1                                     |
| NEV4        | 300              | 298/300 (99.33%)                             | MH084327.1                                     | 300              | 297/300 (99.00%)                             | MH084327.1                                     | 300              | 293/300 (97.67%)                             | MH084327.1                                     |
| NEV6        | 324              | 313/324 (96.61%)                             | LN876160.1                                     | 324              | 312/324 (96.30%)                             | LN876160.1                                     | 324              | 313/324 (96.61%)                             | LN876160.1                                     |
| NEV7        | 321              | 315/321 (98.13%)                             | HG793729.1                                     | 321              | 315/321 (98.13%)                             | HG793729.1                                     | 321              | 315/321 (98.13%)                             | HG793729.1                                     |
| NEV8        | 300              | 300/300 (100.00%)                            | MH472702.1                                     | 300              | 299/300 (99.67%)                             | MH472702.1                                     | 300              | 299/300 (99.67%)                             | MH472702.1                                     |
| NEV19       | 324              | 311/324 (95.99%)                             | HG793679.1                                     | 324              | 311/324 (95.99%)                             | HG793679.1                                     | 324              | 311/324 (95.99%)                             | HG793679.1                                     |
| NEV35       | 297              | /283/297 (95.29%)                            | JN203507.1                                     | 297              | 283/297 (95.29%)                             | JN203507.1                                     | 297              | 283/297 (95.29%)                             | JN203507.1                                     |
| NEV36       | 324              | /314/324 (96.91%)                            | LN876160.1                                     | 324              | 314/324 (96.91%)                             | LN876160.1                                     | 324              | 314/324 (96.91%)                             | LN876160.1                                     |
| NEV38       | 312              | 299/312 (95.83%)                             | MF678314.1                                     | 312              | 299/312 (95.83%)                             | MF678314.1                                     | 312              | 299/312 (95.83%)                             | MF678314.1                                     |
| NEV39       | 324              | 313/324 (96.61%)                             | LN876160.1                                     | 324              | 313/324 (96.61%)                             | LN876160.1                                     | 324              | 313/324 (96.61%)                             | LN876160.1                                     |
| NEV40       | 324              | 309/324 (95.37%)                             | HG793732.1                                     | 323              | 308/324 (95.06%)                             | HG793732.1                                     | 323              | 308/324 (95.06%)                             | HG793732.1                                     |
| NEV41       | 324              | 308/324 (95.06%)                             | HG793732.1                                     | 323              | 308/324 (95.06%)                             | HG793732.1                                     | 323              | 308/324 (95.06%)                             | HG793732.1                                     |
| NEV44       | 297              | 291/297 (97.98%)                             | KR185978.1                                     | 297              | 291/297 (97.98%)                             | KR185978.1                                     | 297              | 291/297 (97.98%)                             | KR185978.1                                     |
| GEV1        | 324              | 314/324 (96.91%)                             | HG793732.1                                     | 323              | 314/324 (96.91%)                             | HG793732.1                                     | 323              | 313/324 (96.61%)                             | HG793732.1                                     |
| GEV2        | 324              | 314/324 (96.91%)                             | HG793732.1                                     | 324              | 314/324 (96.91%)                             | HG793732.1                                     | 323              | 314/324 (96.91%)                             | HG793732.1                                     |
| GEV3        | 300              | 296/300 (98.67%)                             | MH010203.1                                     | 300              | 296/300 (98.67%)                             | MH010203.1                                     | 300              | 296/300 (98.67%)                             | MH010203.1                                     |
| GEV4        | 323              | 314/324 (96.91%)                             | HG793732.1                                     | 323              | 314/324 (96.91%)                             | HG793732.1                                     | 323              | 314/324 (96.91%)                             | HG793732.1                                     |
| GEV5        | 324              | 314/324 (96.91%)                             | HG793732.1                                     | 323              | 314/324 (96.91%)                             | HG793732.1                                     | 323              | 314/324 (96.91%)                             | HG793732.1                                     |
| GEV7        | 300              | 296/300 (98.67%)                             | MH010203.1                                     | 300              | 296/300 (98.67%)                             | MH010203.1                                     | 300              | 296/300 (98.67%)                             | MH010203.1                                     |
| GEV9        | 297              | 287/297 (96.63%)                             | MH111019.1                                     | 297              | 287/297 (96.63%)                             | MH111019.1                                     | 297              | 287/297 (96.63%)                             | MH111019.1                                     |
| GEV16       | 321              | 306/321 (95.33%)                             | LC201504.1                                     | 321              | 306/321 (95.33%)                             | LC201504.1                                     | 321              | 306/321 (95.33%)                             | LC201504.1                                     |
| GEV17       | 297              | 290/297 (97.64%)                             | MG885750.1                                     | 297              | 289/297 (97.31%)                             | MG885750.1                                     | 297              | 289/297 (97.31%)                             | MG885750.1                                     |
| GEV22       | 300              | 297/300 (99.00%)                             | MH010203.1                                     | 300              | 297/300 (99.00%)                             | MH010203.1                                     | 300              | 297/300 (99.00%)                             | MH010203.1                                     |

**Table S3.** Length and BLAST matches of consensus sequences produced by *LORCAN*.
