# Supplementary material for: Rapid and Cost-Efficient Enterovirus Genotyping from Clinical Samples Using Flongle Flow Cells
Source: MDPI journal article supplement (doi:10.3390/genes10090659), 2019-08-29
Supplement: s1 [file s1]

| Sample Name | Genotype           | RUN 1              |                                    |                |                      |          |                |      |     |                    | RUN 2                              |                |      |                      |                |      |     |                  |                                    |                  |      |     |                      |      |     |
|-------------|--------------------|--------------------|------------------------------------|----------------|----------------------|----------|----------------|------|-----|--------------------|------------------------------------|----------------|------|----------------------|----------------|------|-----|------------------|------------------------------------|------------------|------|-----|----------------------|------|-----|
|             |                    | Barcode Set 1      |                                    |                |                      |          |                |      |     |                    | Barcode Set 1                      |                |      |                      |                |      |     |                  |                                    | Barcode Set 2    |      |     |                      |      |     |
|             |                    | LORCAN Consensus   |                                    |                | Nanopolish Consensus |          |                |      |     |                    | LORCAN Consensus                   |                |      | Nanopolish Consensus |                |      |     |                  |                                    | LORCAN Consensus |      |     | Nanopolish Consensus |      |     |
|             |                    | Alignment length   | Number of reads used for consensus | Seq Ident. (%) | Gaps                 | N's      | Seq Ident. (%) | Gaps | N's | Alignment length   | Number of reads used for consensus | Seq Ident. (%) | Gaps | N's                  | Seq Ident. (%) | Gaps | N's | Alignment length | Number of reads used for consensus | Seq Ident. (%)   | Gaps | N's | Seq Ident. (%)       | Gaps | N's |
| PC          | Echovirus 30       | 324                | 2968                               | 100            | 0                    | 0        | 100            | 0    | 0   | 324                | 1570                               | 99.69          | 1    | 0                    | 99.69          | 1    | 0   | 324              | 2267                               | 99.69            | 1    | 0   | 99.69                | 1    | 0   |
| NEV1        | Coxsackievirus A16 | 299                | 2991                               | 100            | 0                    | 0        | 100            | 0    | 0   | 299                | 1553                               | 100            | 0    | 0                    | 100            | 0    | 0   | 299              | 2484                               | 100              | 0    | 0   | 100                  | 0    | 0   |
| NEV2        | Enterovirus A71    | 300                | 2096                               | 100            | 0                    | 0        | 100            | 0    | 0   | 300                | 1250                               | 99.67          | 0    | 1                    | 99.67          | 0    | 1   | 300              | 1935                               | 99.67            | 0    | 1   | 99.67                | 0    | 1   |
| NEV3        | Echovirus 18       | 321                | 2063                               | 100            | 0                    | 0        | 100            | 0    | 0   | 321                | 834                                | 100            | 0    | 0                    | 100            | 0    | 0   | 321              | 1665                               | 100              | 0    | 0   | 100                  | 0    | 0   |
| NEV4        | Enterovirus A71    | 296 (LC) /299 (NP) | 2572                               | 97.97          | 0                    | 2 N, 4 M | 97.32          | 3    | 5 M | 296 (LC) /298 (NP) | 996                                | 97.64          | 0    | 3 N, 4 M             | 96.98          | 2    | 1 N | 300              | 1999                               | 99.33            | 0    | 1   | 99.67                | 0    | 1   |
| NEV6        | Echovirus 18       | 324                | 2923                               | 100            | 0                    | 0        | 100            | 0    | 0   | 324                | 1206                               | 99.69          | 0    | 1                    | 100            | 0    | 0   | 324              | 1811                               | 100              | 0    | 0   | 100                  | 0    | 0   |
| NEV7        | Echovirus 25       | 321                | 2984                               | 100            | 0                    | 0        | 100            | 0    | 0   | 321                | 1512                               | 100            | 0    | 0                    | 100            | 0    | 0   | 321              | 2968                               | 100              | 0    | 0   | 100                  | 0    | 0   |
| NEV8        | Enterovirus A71    | 300                | 2413                               | 100            | 0                    | 0        | 100            | 0    | 0   | 300                | 1141                               | 99.67          | 0    | 1                    | 99.67          | 0    | 1   | 300              | 2077                               | 99.67            | 0    | 1   | 99.67                | 0    | 1   |
| NEV19       | Echovirus 5        | 324                | 1912                               | 100            | 0                    | 0        | 100            | 0    | 0   | 324                | 864                                | 100            | 0    | 0                    | 100            | 0    | 0   | 324              | 2159                               | 100              | 0    | 0   | 100                  | 0    | 0   |
| NEV35       | Coxsackievirus A4  | 297                | 2426                               | 100            | 0                    | 0        | 100            | 0    | 0   | 297                | 997                                | 99.66          | 0    | 1                    | 100            | 0    | 0   | 297              | 2217                               | 99.33            | 0    | 2   | 99.66                | 0    | 1   |
| NEV36       | Echovirus 18       | 321                | 2315                               | 100            | 0                    | 0        | 100            | 0    | 0   | 321                | 1116                               | 100            | 0    | 0                    | 100            | 0    | 0   | 321              | 1769                               | 100              | 0    | 0   | 100                  | 0    | 0   |
| NEV38       | Coxsackievirus B3  | 283                | 2870                               | 100            | 0                    | 0        | 100            | 0    | 0   | 283                | 1431                               | 100            | 0    | 0                    | 100            | 0    | 0   | 283              | 2423                               | 100              | 0    | 0   | 100                  | 0    | 0   |
| NEV39       | Echovirus 18       | 321                | 2970                               | 100            | 0                    | 0        | 100            | 0    | 0   | 321                | 1376                               | 100            | 0    | 0                    | 100            | 0    | 0   | 321              | 2217                               | 100              | 0    | 0   | 100                  | 0    | 0   |
| NEV40       | Echovirus 30       | 324                | 2934                               | 100            | 0                    | 0        | 100            | 0    | 0   | 324                | 1243                               | 99.69          | 1    | 0                    | 99.69          | 1    | 0   | 324              | 1762                               | 99.69            | 1    | 0   | 99.69                | 1    | 0   |
| NEV41       | Echovirus 30       | 324                | 1739                               | 99.69          | 0                    | 1        | 99.69          | 0    | 1   | 324                | 969                                | 99.69          | 1    | 0                    | 99.69          | 1    | 0   | 324              | 1749                               | 99.69            | 1    | 0   | 99.69                | 1    | 0   |
| NEV44       | Coxsackievirus A4  | 297                | 2930                               | 100            | 0                    | 0        | 100            | 0    | 0   | 297                | 1932                               | 100            | 0    | 0                    | 100            | 0    | 0   | 297              | 2857                               | 100              | 0    | 0   | 100                  | 0    | 0   |
| GEV1        | Echovirus 30       | 324                | 1841                               | 99.69          | 0                    | 1        | 99.69          | 0    | 1   | 324                | 850                                | 99.69          | 1    | 0                    | 99.69          | 1    | 0   | 324              | 2709                               | 99.38            | 1    | 1   | 99.38                | 1    | 1   |
| GEV2        | Echovirus 30       | 320                | 2981                               | 99.69          | 0                    | 1        | 99.69          | 0    | 1   | 320                | 1639                               | 99.69          | 0    | 1                    | 99.69          | 0    | 1   | 320              | 2433                               | 99.69            | 1    | 0   | 99.69                | 1    | 0   |
| GEV3        | Coxsackievirus A16 | 300                | 2989                               | 100            | 0                    | 0        | 100            | 0    | 0   | 300                | 1548                               | 100            | 0    | 0                    | 100            | 0    | 0   | 300              | 2175                               | 100              | 0    | 0   | 100                  | 0    | 0   |
| GEV4        | Echovirus 30       | 324                | 2397                               | 99.69          | 1                    | 0        | 99.69          | 1    | 0   | 324                | 1242                               | 99.69          | 1    | 0                    | 99.69          | 1    | 0   | 324              | 2476                               | 99.69            | 1    | 0   | 99.69                | 1    | 0   |
| GEV5        | Echovirus 30       | 324                | 2994                               | 99.69          | 0                    | 1        | 99.69          | 0    | 1   | 324                | 1712                               | 99.69          | 1    | 0                    | 99.69          | 1    | 0   | 324              | 2975                               | 99.69            | 1    | 0   | 99.69                | 1    | 0   |
| GEV7        | Coxsackievirus A16 | 300                | 2992                               | 100            | 0                    | 0        | 100            | 0    | 0   | 300                | 1562                               | 100            | 0    | 0                    | 100            | 0    | 0   | 300              | 1704                               | 100              | 0    | 0   | 100                  | 0    | 0   |
| GEV9        | Coxsackievirus A2  | 297                | 1809                               | 99.66          | 0                    | 1        | 99.66          | 0    | 1   | 297                | 899                                | 99.66          | 0    | 1                    | 99.66          | 0    | 1   | 297              | 1654                               | 99.66            | 0    | 1   | 99.66                | 0    | 1   |
| GEV16       | Echovirus E25      | 321                | 1621                               | 100            | 0                    | 0        | 100            | 0    | 0   | 321                | 793                                | 100            | 0    | 0                    | 100            | 0    | 0   | 321              | 2578                               | 100              | 0    | 0   | 100                  | 0    | 0   |
| GEV17       | Coxsackievirus A6  | 288                | 2212                               | 100            | 0                    | 0        | 100            | 0    | 0   | 288                | 1164                               | 99.65          | 0    | 1                    | 100            | 0    | 0   | 288              | 2918                               | 99.65            | 0    | 1   | 100                  | 0    | 0   |
| GEV22       | Coxsackievirus A16 | 297                | 2334                               | 100            | 0                    | 0        | 100            | 0    | 0   | 297                | 1103                               | 100            | 0    | 0                    | 100            | 0    | 0   | 297              | 2986                               | 100              | 0    | 0   | 100                  | 0    | 0   |

**Table S2: Sequence comparison of nanopore consensus sequences relative to the Sanger sequence.** For each sample, the genotype assigned to both Sanger and Nanopore consensus sequences is indicated. For each run and barcode set, the sequence identity was calculated from the LORCAN consensus and after applying nanopolish. Additionally, alignment length, the number of gaps and N's (unassigned bases) in the sequence alignments are indicated. M= Mismatch, N= unassigned base, LC = LORCAN, NP= Nanopolish. Sequence Identity (%) is always relative to the Sanger sequence obtained from the same amplicon.
